# Supplementary material for: Periodic Variation of Mutation Rates in Bacterial Genomes Associated with Replication Timing
Source: PubMed Central journal article supplement (PMC6106087; doi:10.1128/mbio.01371-18), 2018-08-21
Supplement: mbo004184027sf2.pdf [file mbo004184027sf2.pdf]

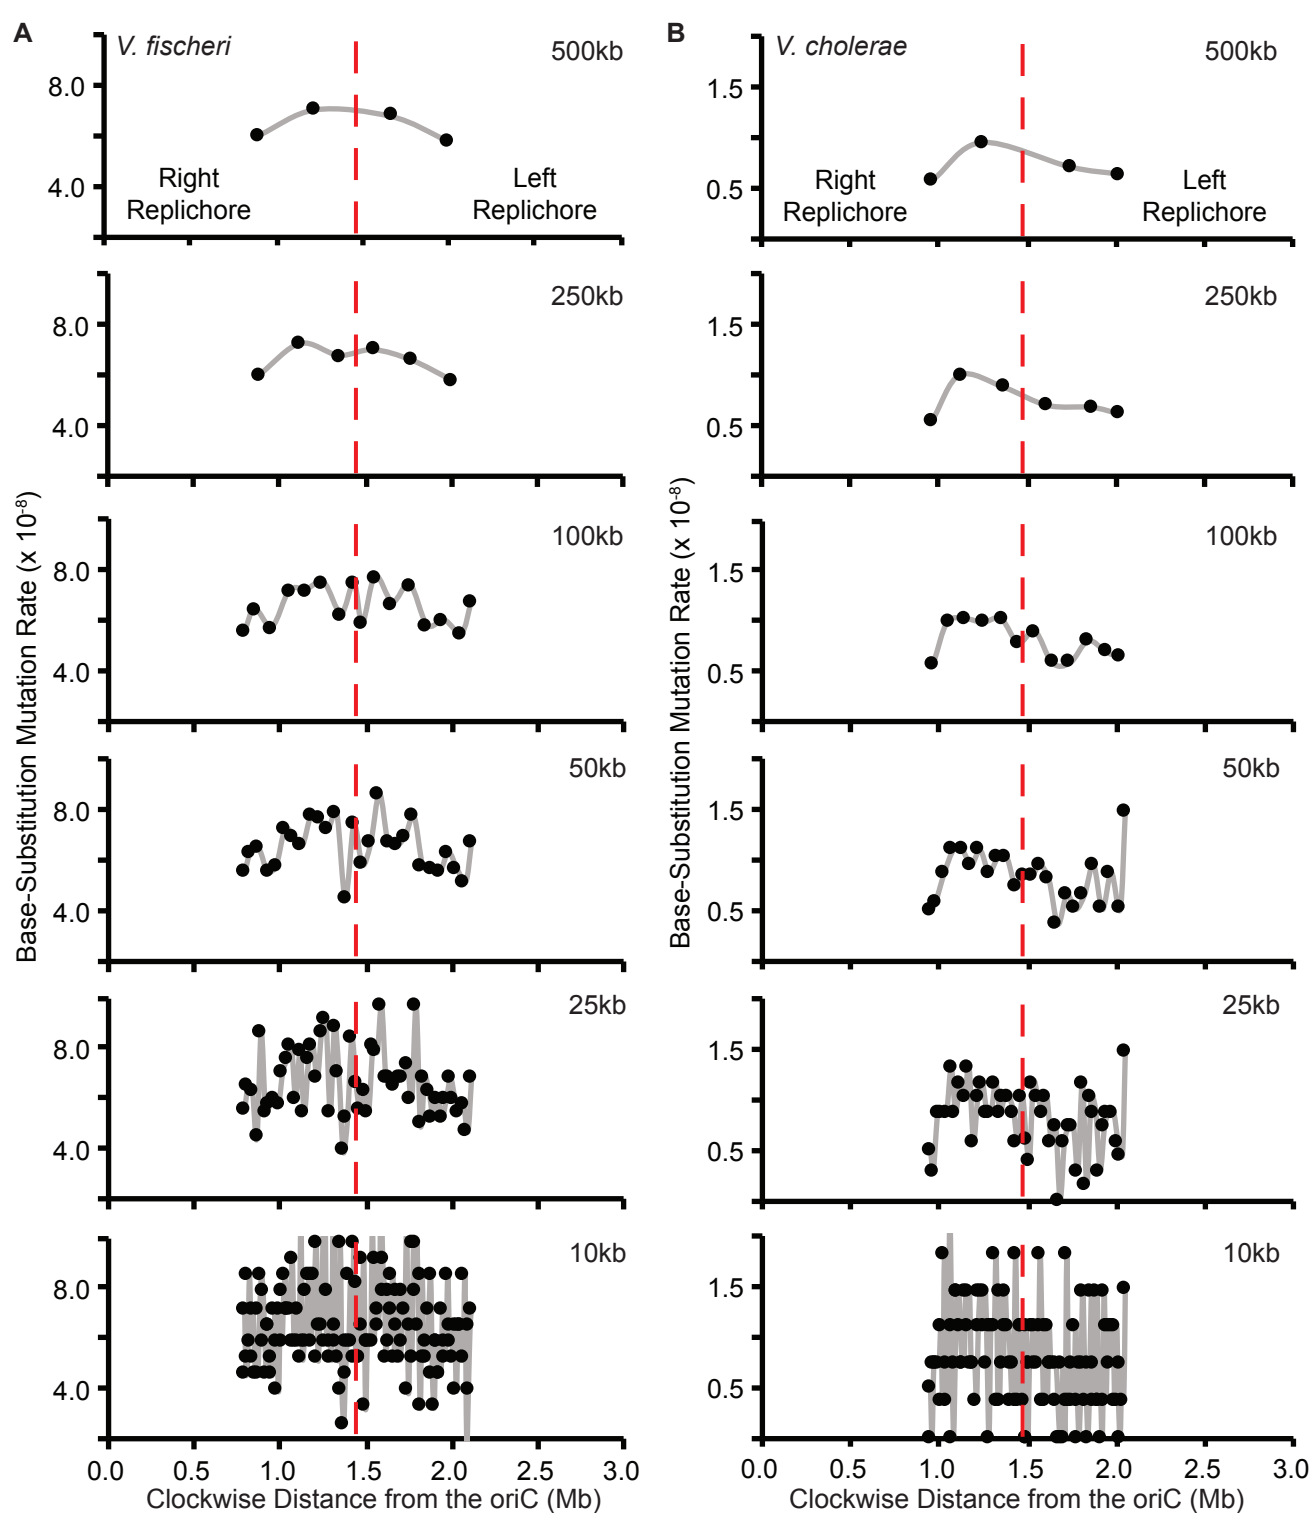

**Figure S2.** Patterns of base-substitution mutation (bpsm) rates at various size intervals extending clockwise from the origin of replication (*oriC*), in MMR-deficient mutation accumulation lineages of *Vibrio fischeri* (A) and *Vibrio cholerae* (B) on chromosome 2. All interval breakpoints are plotted relative to the initiation of replication of *oriC* so that the boundaries of the intervals are at identical locations.
