# Supplementary material for: Periodic Variation of Mutation Rates in Bacterial Genomes Associated with Replication Timing
Source: PubMed Central journal article supplement (PMC6106087; doi:10.1128/mbio.01371-18), 2018-08-21
Supplement: mbo004184027sf3.pdf [file mbo004184027sf3.pdf]

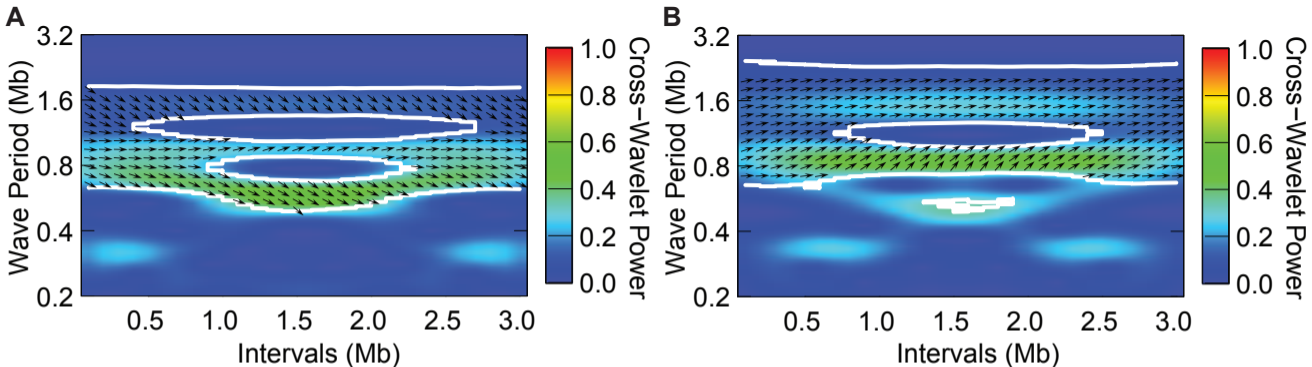

**Figure S3.** Cross-wavelet power spectrum plots comparing the patterns of base-substitution mutation (bpsm) rates in 100 Kb intervals extending clockwise from the *oriCl* region to those extending counterclockwise from the *oriCl* region in MMR-deficient mutation accumulation lineages of *Vibrio fischeri* (A) and *Vibrio cholerae* (B). Plots were generated using the WaveletComp package for Computational Wavelet Analysis in R, using an interval color key, 100 simulations, and significant synchronicity cutoffs of  $p < 0.1$  for contour (white lines) and  $p < 0.05$  for arrows.
