# Supplementary material for: Periodic Variation of Mutation Rates in Bacterial Genomes Associated with Replication Timing
Source: PubMed Central journal article supplement (PMC6106087; doi:10.1128/mbio.01371-18), 2018-08-21
Supplement: mbo004184027sf4.pdf [file mbo004184027sf4.pdf]

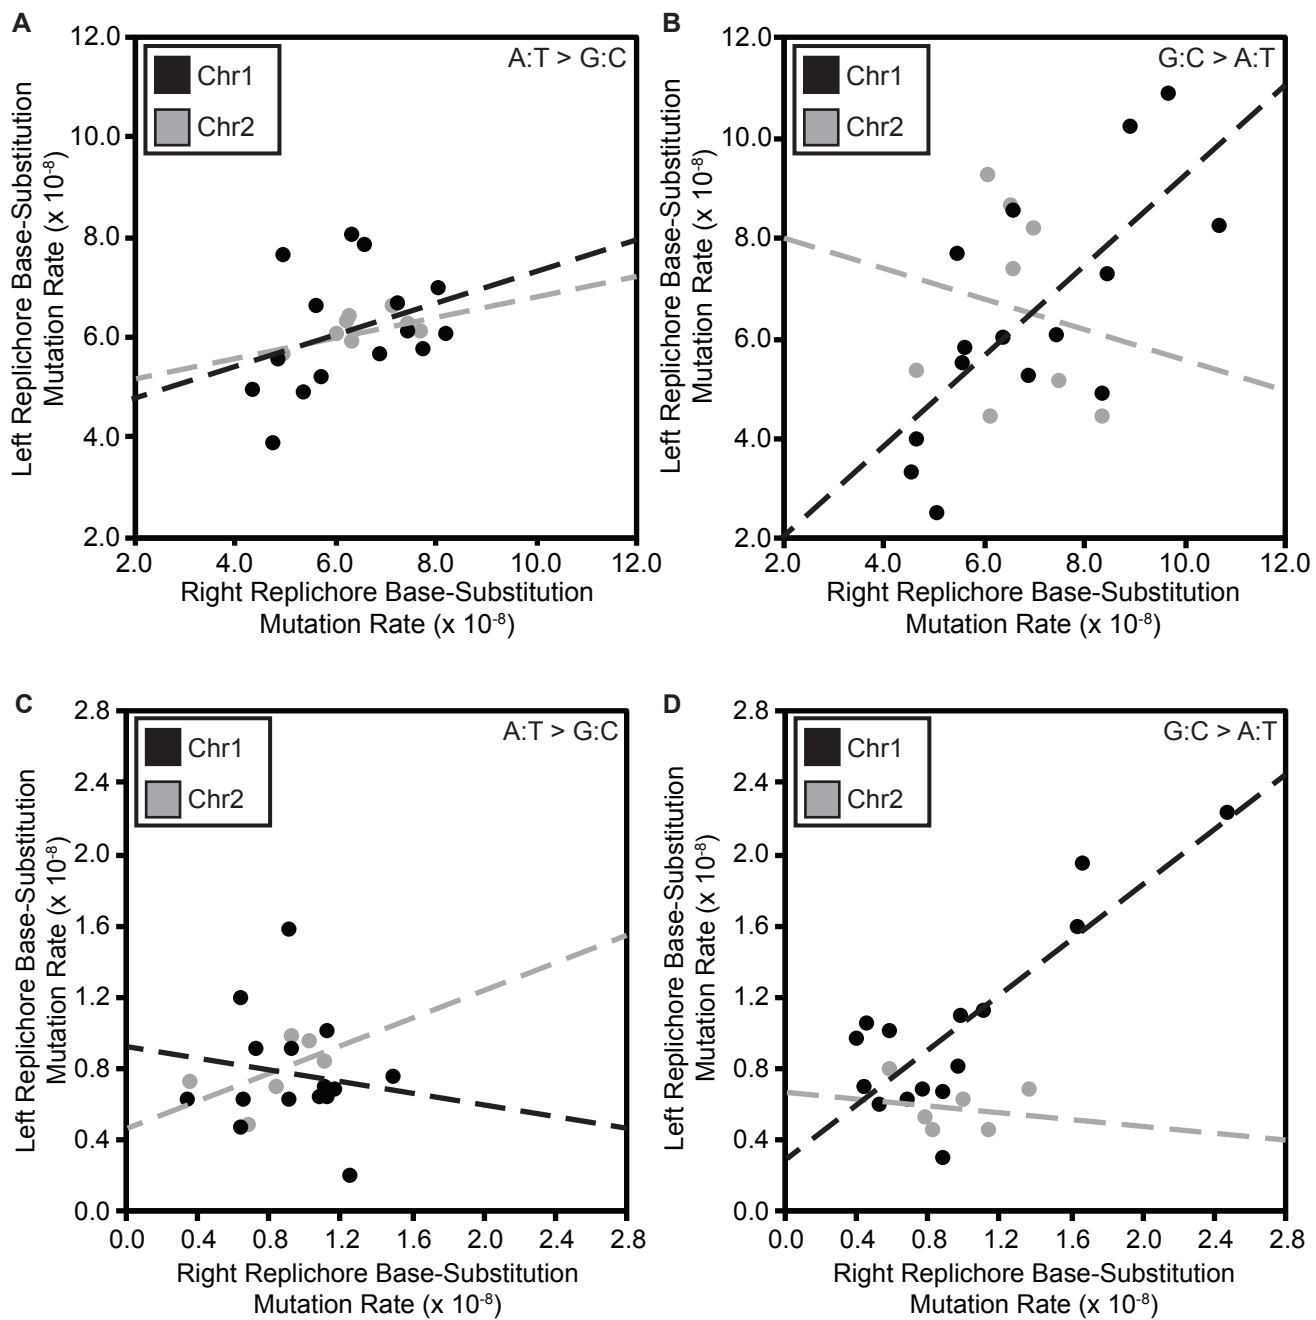

**Figure S4:** Relationship between base-substitution mutation (bpsm) rates in 100 Kb intervals on the right replichore with concurrently replicated 100 Kb intervals on the left replichore for  $A:T > G:C$  (A) and  $G:C > A:T$  (B) bpsms in MMR-deficient *Vibrio fischeri* and C)  $A:T > G:C$  and D)  $G:C > A:T$  bpsms in MMR-deficient *Vibrio cholerae*. Only the relationship between  $G:C > A:T$  bpsm rates of concurrently replicated regions on chr1 is significantly positive (Vf:  $A:T > G:C$ : Chr1 -  $F = 1.77$ ,  $df = 13$ ,  $p = 0.2067$ ,  $r^2 = 0.12$ , Chr2 -  $F = 3.26$ ,  $df = 6$ ,  $p = 0.1209$ ,  $r^2 = 0.35$ ;  $G:C > A:T$ : Chr1 -  $F = 13.32$ ,  $df = 13$ ,  $p = 0.0029$ ,  $r^2 = 0.51$ , Chr2 -  $F = 0.17$ ,  $df = 6$ ,  $p = 0.6947$ ,  $r^2 = 0.03$ ; Vc:  $A:T > G:C$ : Chr1 -  $F = 0.24$ ,  $df = 13$ ,  $p = 0.6313$ ,  $r^2 = 0.02$ , Chr2 -  $F = 1.74$ ,  $df = 4$ ,  $p = 0.2574$ ,  $r^2 = 0.30$ ;  $G:C > A:T$ : Chr1 -  $F = 28.99$ ,  $df = 13$ ,  $p = 0.0001$ ,  $r^2 = 0.6904$ , Chr2 -  $F = 0.15$ ,  $df = 4$ ,  $p = 0.7209$ ,  $r^2 = 0.04$ ).
