# Supplementary material for: Periodic Variation of Mutation Rates in Bacterial Genomes Associated with Replication Timing
Source: PubMed Central journal article supplement (PMC6106087; doi:10.1128/mbio.01371-18), 2018-08-21
Supplement: mbo004184027sf5.pdf [file mbo004184027sf5.pdf]

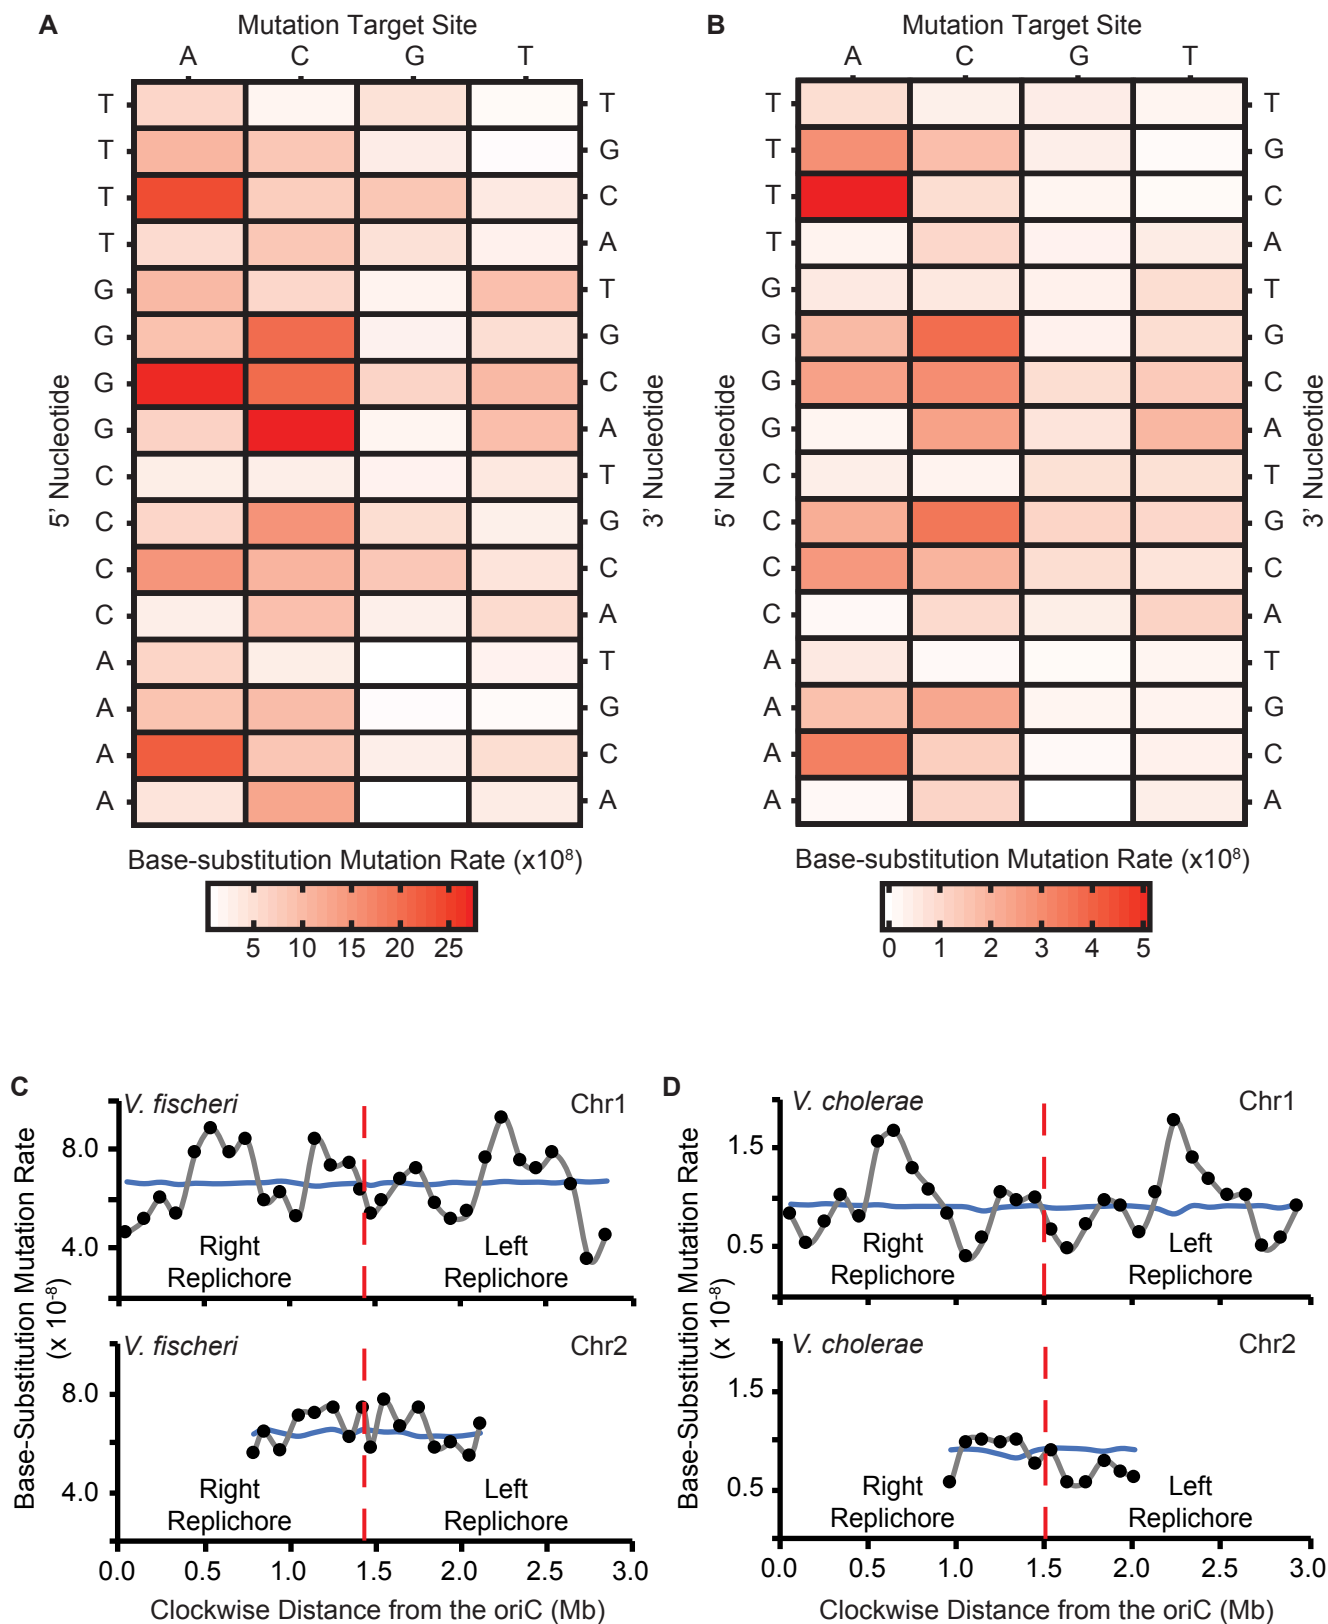

**Figure S5.** Effects of nucleotide context (trimer content) on bpsm rates. A) Heatmap of the context dependent base-substitution mutation (bpsm) rates for the 64 possible trimer combinations based on their lagging strand orientation in MMR-deficient mutation accumulation lineages of *V. fischeri* (A) and *V. cholerae* (B). B) Patterns of base-substitution mutation (bpsm) rates in 100 Kb intervals extending clockwise from the origin of replication (oriCI) in MMR-deficient mutation accumulation lineages of *V. fischeri* (C) and *V. cholerae* (D). Observed patterns of bpsm rates (gray lines) on chromosome 1 (Chr1) and chromosome 2 (Chr2) are compared to the expected patterns of bpsm rates (blue lines) based on the trimer content of the interval. Bpsm rates differ significantly from expectations based on trimer content: Chi-square test; Vf-mut: Chr1 -  $\chi^2 = 137.24$ ,  $df = 29$ ,  $p < 0.0001$ , Chr2 -  $\chi^2 = 20.04$ ,  $df = 15$ ,  $p = 0.1703$ ; Vc-mut: Chr1 -  $\chi^2 = 107.55$ ,  $df = 29$ ,  $p < 0.0001$ , Chr2 -  $\chi^2 = 14.87$ ,  $df = 1$ ,  $p = 0.1887$ )
