# Supplementary material for: Periodic Variation of Mutation Rates in Bacterial Genomes Associated with Replication Timing
Source: PubMed Central journal article supplement (PMC6106087; doi:10.1128/mbio.01371-18), 2018-08-21
Supplement: mbo004184027sf6.pdf [file mbo004184027sf6.pdf]

*V. fischeri*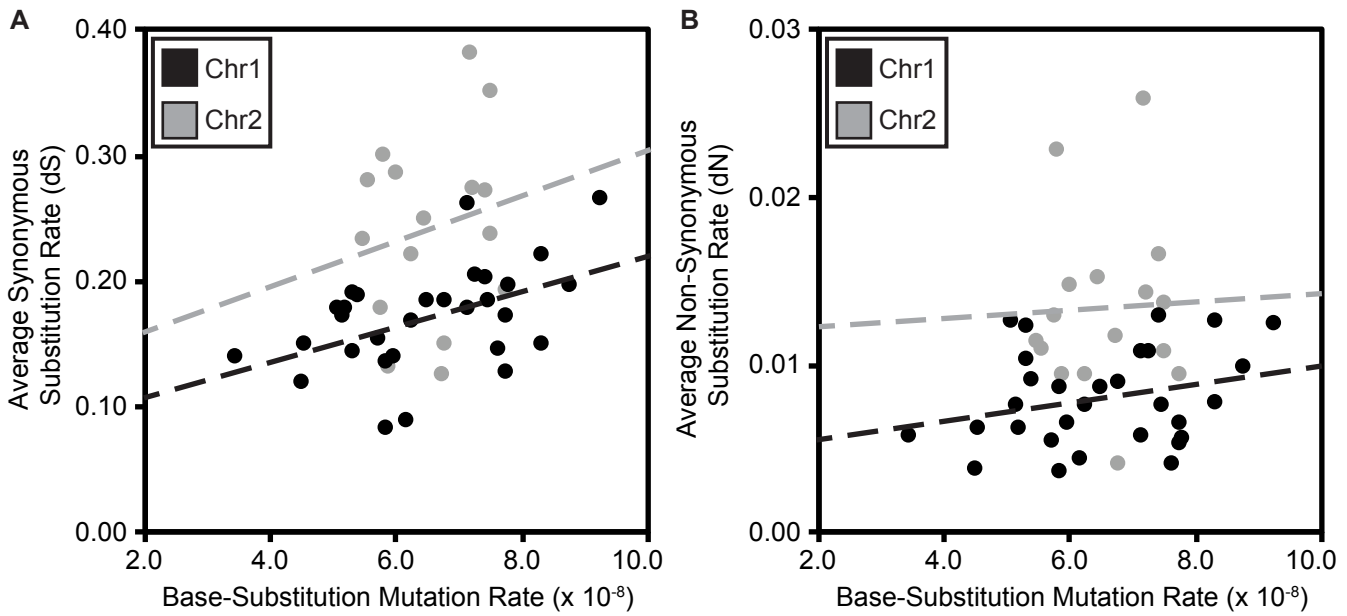*V. cholerae*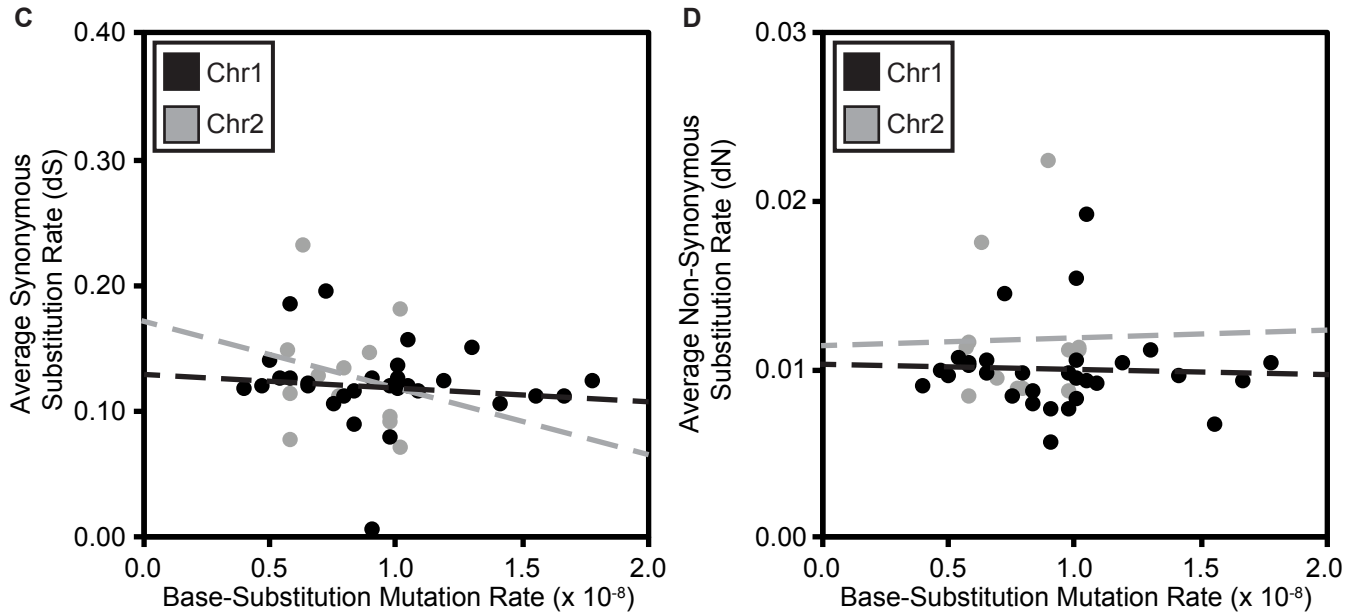

**Figure S6.** Relationship between base-substitution mutation rates (bpsm) with average synonymous substitution rates (left panels) and average non-synonymous substitution rates (right panels) of genes. *V. fischeri*, top row, *V. cholerae*, bottom row, Average synonymous and non-synonymous substitution rates were calculated using the average rates of all one-to-one orthologs shared between *V. fischeri* ES114 and *V. fischeri* MJ11, or between *V. cholerae* 2740-80 and *V. cholerae* HE-16 within each 100kb interval. Synonymous and non-synonymous substitution rates for individual genes were calculated as described in (Yang and Nielsen 2000). In *V. fischeri*, only the relationship between bpsm rates and synonymous substitution rates on chromosome 1 is significant (A: Chr1 -  $F = 8.32$ ,  $df = 28$ ,  $p = 0.0080$ ,  $r^2 = 0.23$ , Chr2 -  $F = 0.56$ ,  $df = 14$ ,  $p = 0.4681$ ,  $r^2 = 0.04$ ; B: Chr1 -  $F = 2.14$ ,  $df = 28$ ,  $p = 0.1554$ ,  $r^2 = 0.07$ , Chr2 -  $F = 0.03$ ,  $df = 14$ ,  $p = 0.8692$ ,  $r^2 = 0.02$ ), and in *V. cholerae*, none are significant (C: Chr1 -  $F = 0.43$ ,  $df = 28$ ,  $p = 0.5186$ ,  $r^2 = 0.02$ , Chr2 -  $F = 0.49$ ,  $df = 10$ ,  $p = 0.5010$ ,  $r^2 = 0.05$ ; D: Chr1 -  $F = 0.02$ ,  $df = 28$ ,  $p = 0.8897$ ,  $r^2 = 0.01$  10<sup>-1</sup>, Chr2 -  $F = 0.01$ ,  $df = 10$ ,  $p = 0.9218$ ,  $r^2 = 0.01$  10<sup>-1</sup>).
